# Supplementary material for: Data-driven rolling model for global wave height
Source: Copernicus journal article supplement (doi:10.5194/gmd-18-5101-2025), 2025-08-19
Supplement: Supplementary file 1 [file gmd-18-5101-2025-supplement.pdf]

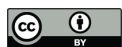

*Supplement of*

## **Data-driven rolling model for global wave height**

**Xinxin Wang et al.**

*Correspondence to:* Haoyu Jiang ([haoyujiang@szu.edu.cn](mailto:haoyujiang@szu.edu.cn))

The copyright of individual parts of the supplement might differ from the article licence.

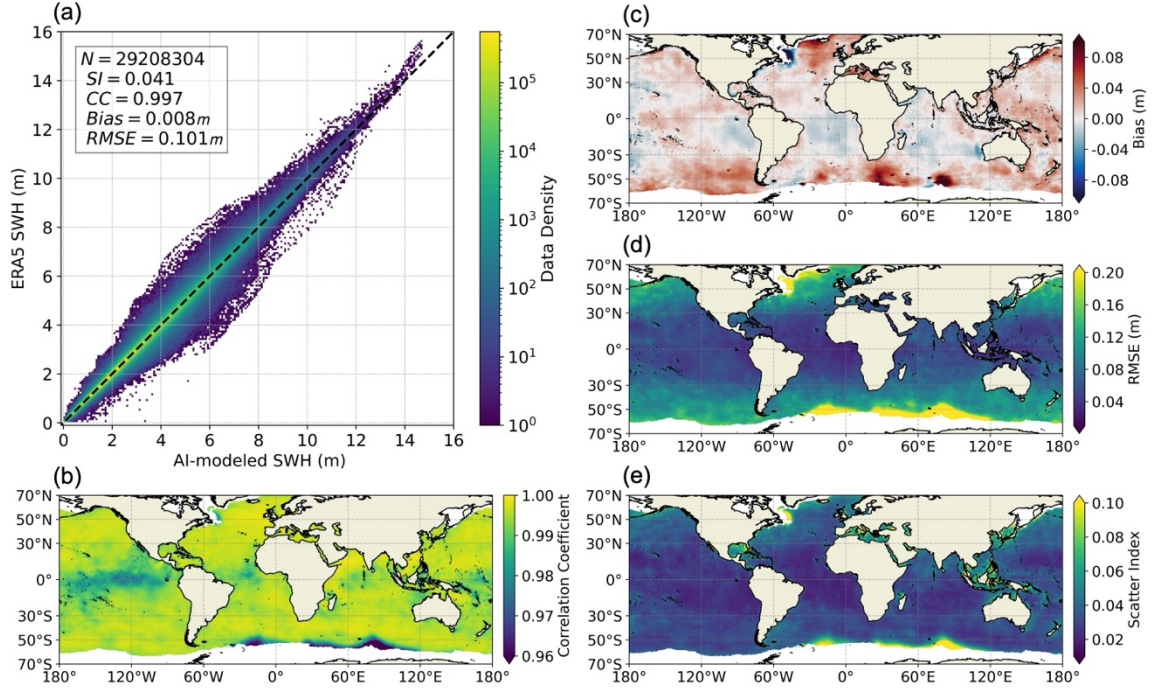

**Figure S1:** Comparison of SWHs from the AI model (without data assimilation) at 6-h hindcast time with ERA5 for the year 2020. (a) The scatter plot between the SWHs from the two datasets. (b-e) The global spatial distributions of CC, bias, RMSE, and SI, respectively.

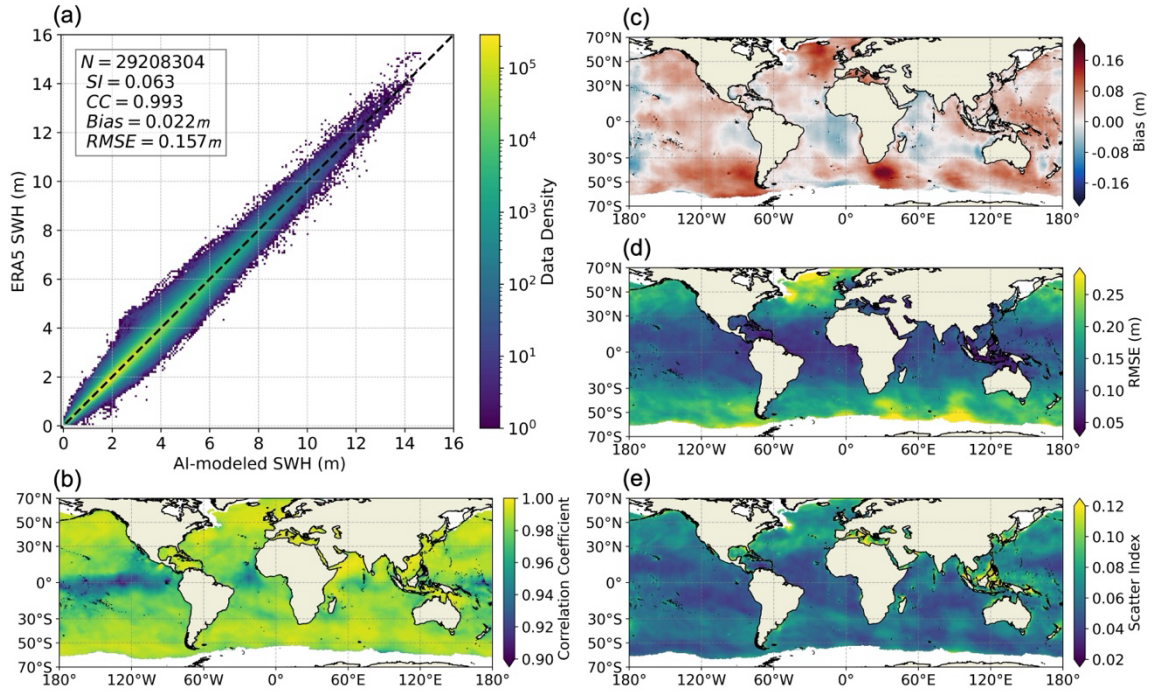

**Figure S2:** The same as Fig. S1, but for hindcast time of 24 hours.

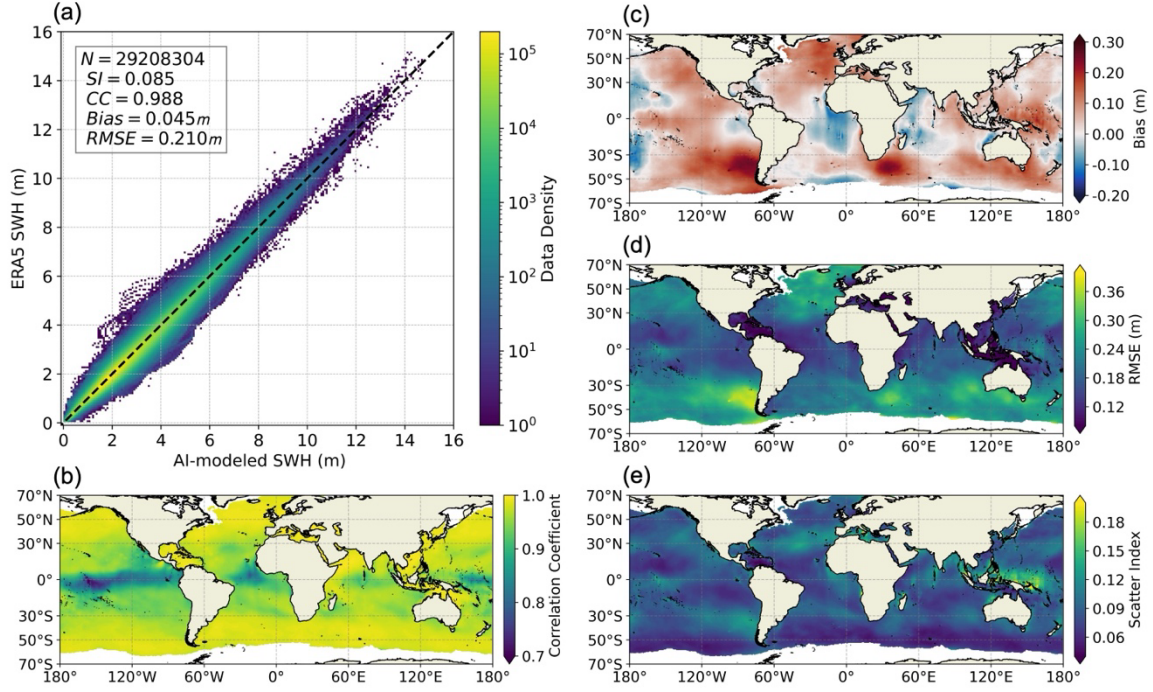

**Figure S3:** The same as Fig. S1, but for hindcast time of 72 hours.

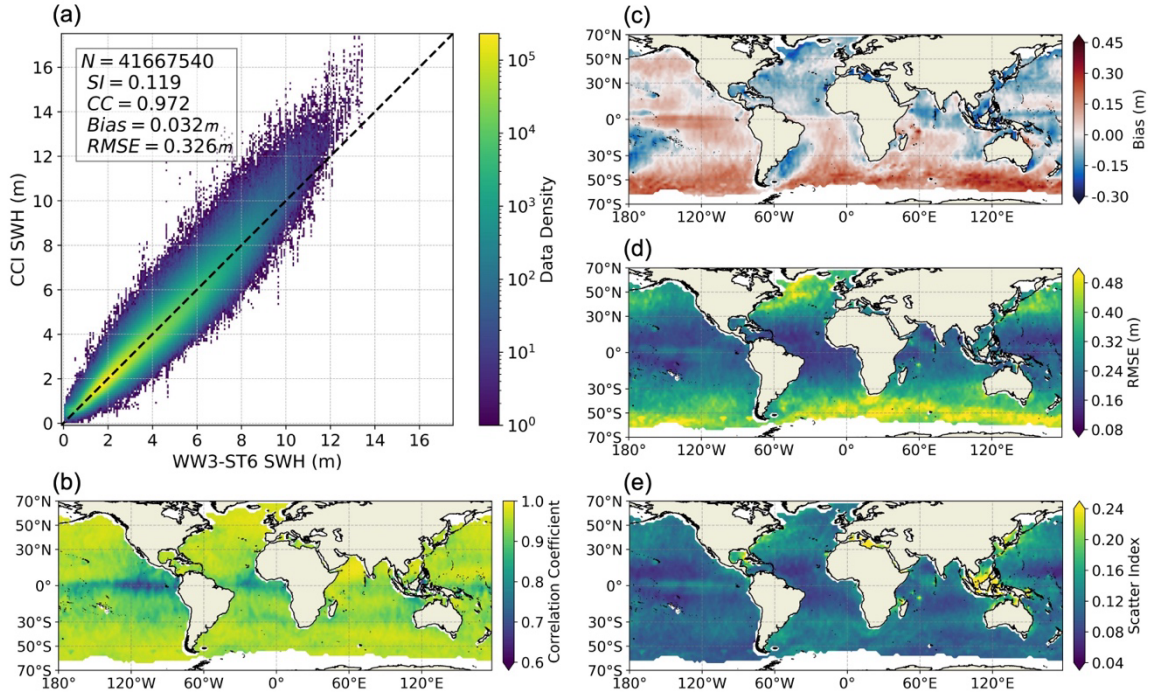

**Figure S4:** The comparison between SWHs from the WW3-ST6 numerical wave model and CCI-sea state in 2020 for global ocean. (a) The scatter plot between the SWHs from the two datasets. (b-e) The spatial distributions of CC, bias, RMSE, and SI, respectively.



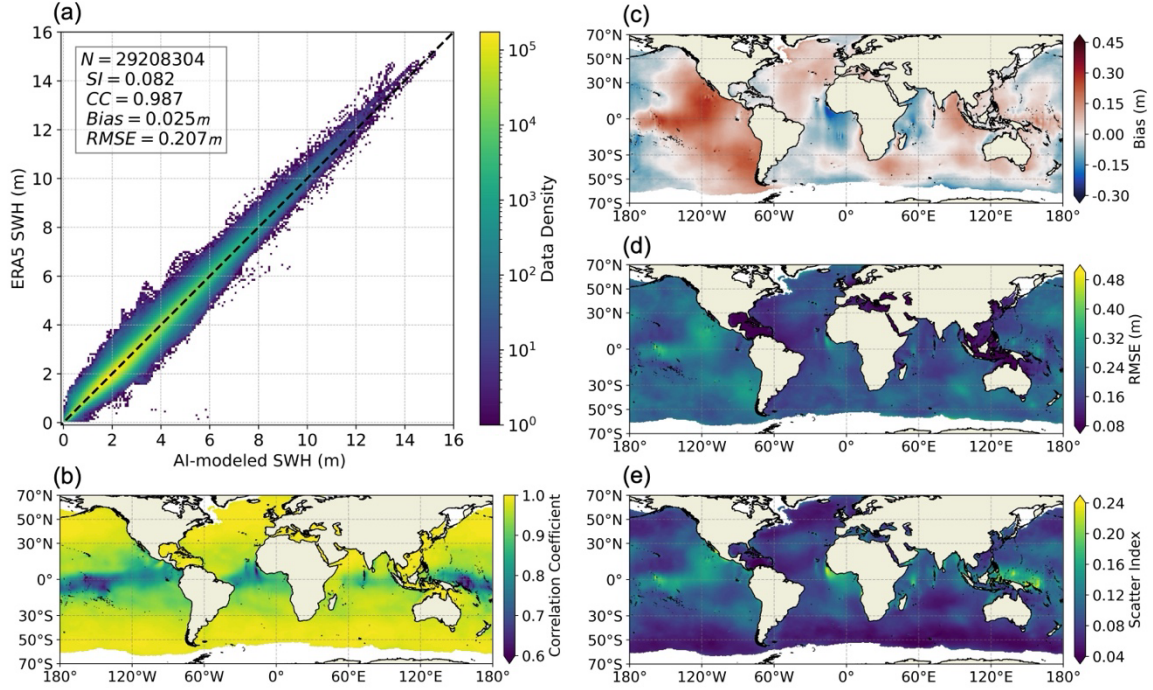

**Figure S5:** Comparison of SWHs from the AI model (without data assimilation) at 240-h hindcast time (when the errors are stable) with ERA5 for the year 2000. (a) The scatter plot between the SWHs from the two datasets. (b-e) The global spatial distributions of CC, bias, RMSE, and SI, respectively.

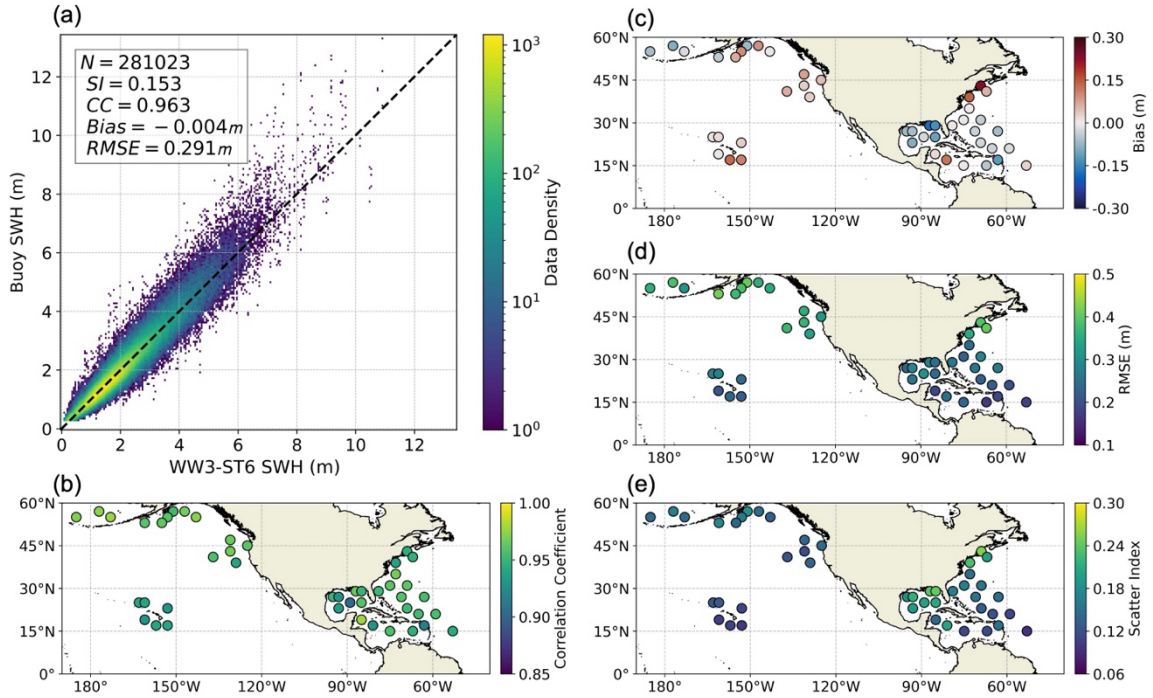

**Figure S6:** The comparison between SWHs from the WW3-ST6 numerical wave model and NDBC Buoy in 2020 for global ocean. (a) The scatter plot between the SWHs from the two datasets. (b-e) The spatial distributions of CC, bias, RMSE, and SI, respectively.



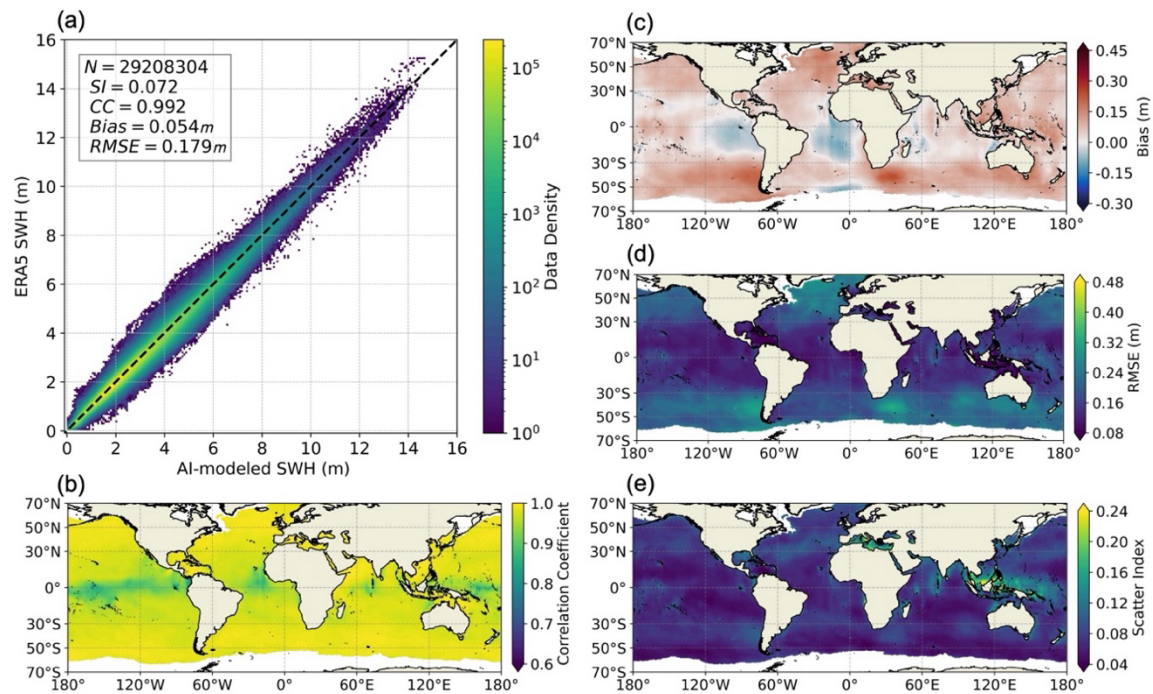

**Figure S7:** Comparison of SWHs from the AI model (with data from CCI-Sea State assimilated every six hours) at 240-h hindcast time (when the errors are stable) with ERA5 for the year 2020. (a) Scatter plot between the SWHs from the two datasets. (b-e) Global spatial distributions of CC, bias, RMSE, and SI, respectively.

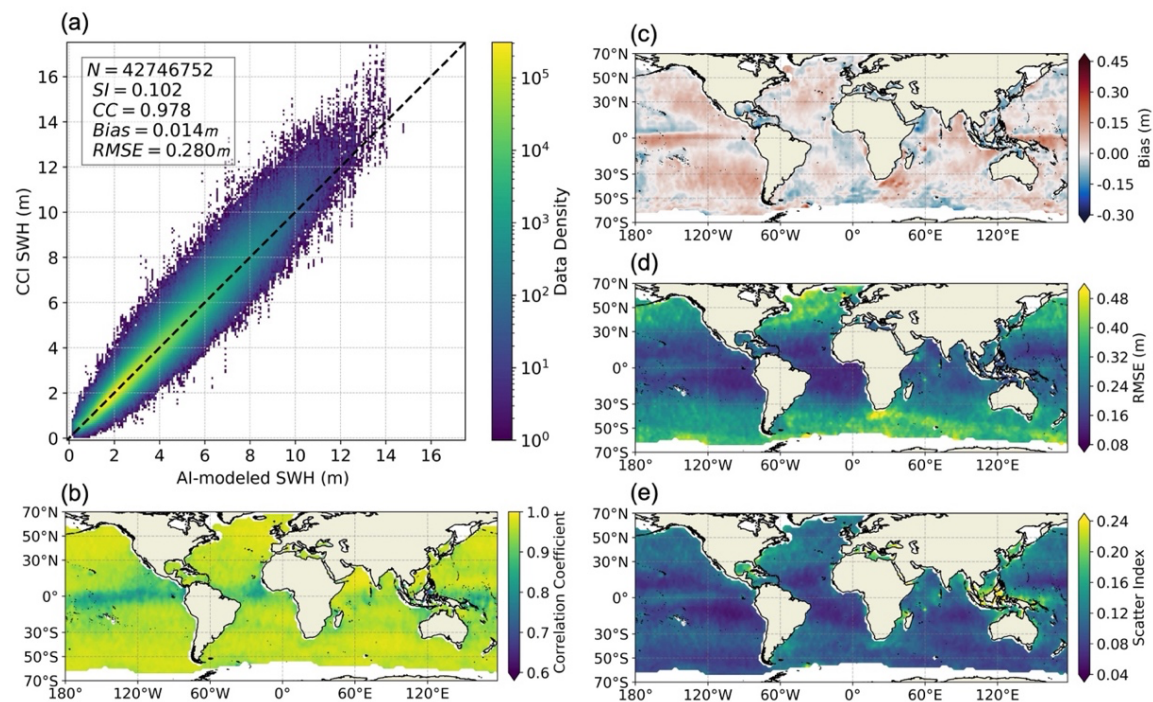

**Figure S8:** The same as Fig. S7, but the comparison is with the CCI-Sea State dataset.

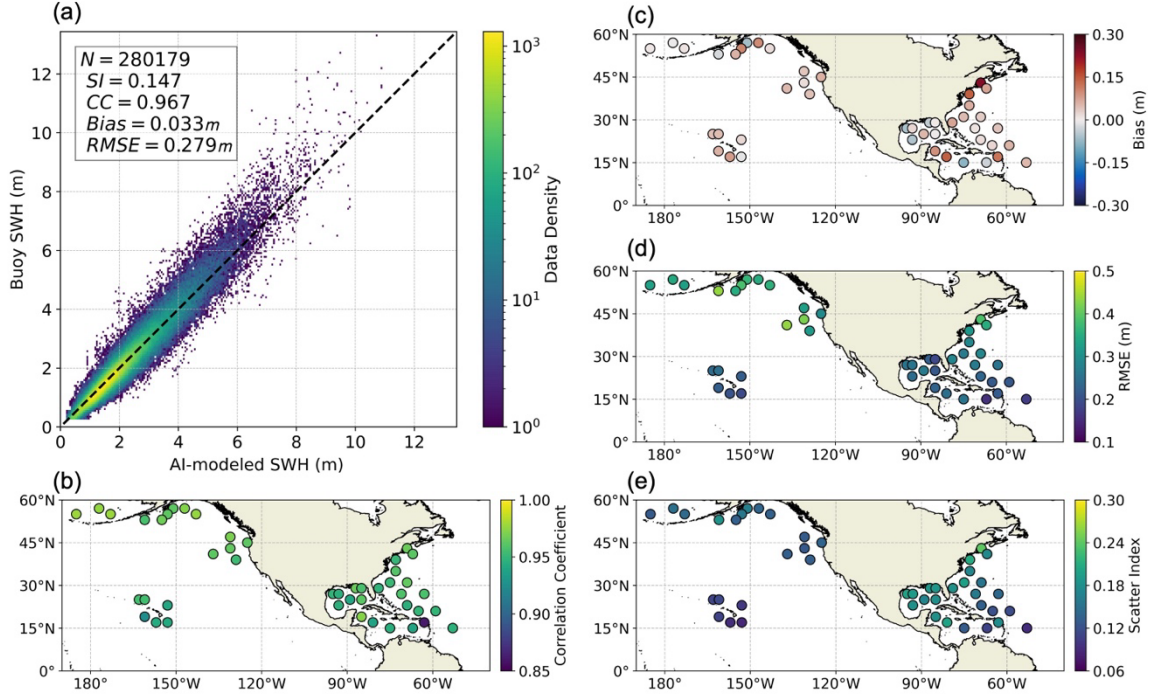

**Figure S9** The comparison between SWHs from the AI model (with data from CCI-Sea State assimilated every six hours) and NDBC Buoy in 2020 for global ocean. (a) The scatter plot between the SWHs from the two datasets. (b-e) The spatial distributions of CC, bias, RMSE, and SI, respectively.

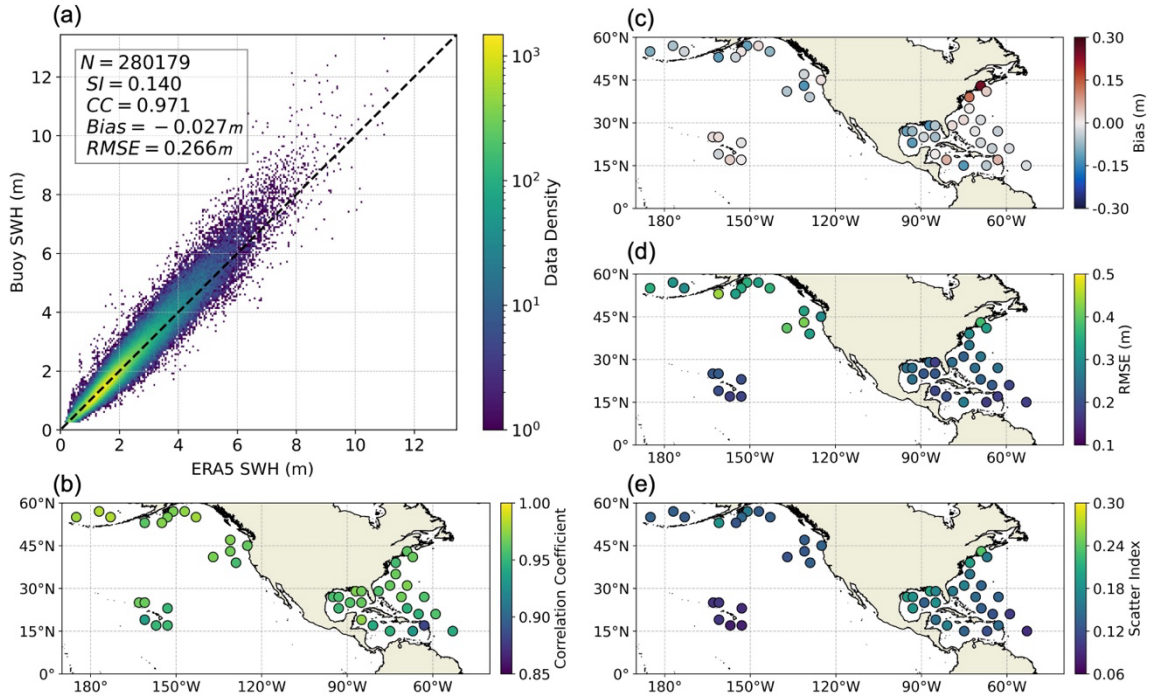

**Figure S10:** The same as Figures S6 and S9, but the comparison is between the ERA5 and NDBC Buoy

**Movie S1: Comparison between SWHs from the AI model and ERA5 for the global ocean in 2020 as an animation.** The AI model starts to run using a rolling simulation strategy from 01-Jan-2020 00:00:00. The upper panel shows the evolution of ERA5 SWH fields, the lower panel shows the corresponding AI-modeled SWH fields without using data assimilation.

**Movie S2: The same as Movies S1. but the AI model uses data assimilation.**
